# Supplementary material
Source: HighWire-hosted journal article supplement (https://adc.bmj.com/content/107/9/796)
Supplement: inline-supplementary-material-3 [file inline-supplementary-material-3.pdf]

Supplementary Table 2. Observer-reported outcomes for the 171 evaluations of tablet intake, stratified by patient age.

| Outcomes                                   | 0 to 2 years<br>(n = 36) | 3 to 5 years<br>(n = 25) | 6 to 11 years<br>(n = 41) | 12 to 15 years<br>(n = 69) | Statistical<br>Test (p value) |
|--------------------------------------------|--------------------------|--------------------------|---------------------------|----------------------------|-------------------------------|
| <b>Result intake</b>                       |                          |                          |                           |                            |                               |
| Fully taken                                | 31 (86) <sup>a</sup>     | 24 (96)                  | 38 (93)                   | 68 (99)                    | F: p=.016                     |
| Partly taken                               | 5 (14)                   | 1 (4)                    | 3 (7)                     | 0 (0)                      |                               |
| Not taken                                  | 0 (0)                    | 0 (0)                    | 0 (0)                     | 1 (1)                      |                               |
| <b>Patient reaction</b>                    |                          |                          |                           |                            |                               |
| Positive reaction                          | 21 (58)                  | 13 (52)                  | 27 (66)                   | 47 (68)                    | F: p=.018                     |
| Neutral reaction                           | 9 (25)                   | 6 (24)                   | 12 (29)                   | 21 (30)                    |                               |
| Negative reaction                          | 6 (17)                   | 6 (24)                   | 2 (5)                     | 1 (1)                      |                               |
| <b>Preparation and administration time</b> |                          |                          |                           |                            |                               |
| Short time                                 | 2 (6)                    | 5 (21)                   | 6 (15)                    | 16 (24)                    | $\chi^2$ : p=.011             |
| Medium time                                | 9 (27)                   | 7 (29)                   | 21 (51)                   | 32 (47)                    |                               |
| Long time                                  | 22 (67)                  | 12 (50)                  | 14 (34)                   | 20 (29)                    |                               |
| missing data                               | 3                        | 1                        | 0                         | 1                          |                               |
| <b>Divided dose</b>                        |                          |                          |                           |                            |                               |
| No divided dose                            | 17 (47)                  | 16 (64)                  | 30 (73)                   | 61 (88)                    | $\chi^2$ : p<.001             |
| Use divided dose                           | 19 (53)                  | 9 (36)                   | 11 (27)                   | 8 (12)                     |                               |
| <b>Food/drink</b>                          |                          |                          |                           |                            |                               |
| No food/drink                              | 13 (36)                  | 17 (68)                  | 38 (93)                   | 67 (97)                    | $\chi^2$ : p<.001             |
| Use food/drink                             | 23 (64)                  | 8 (32)                   | 3 (7)                     | 2 (3)                      |                               |
| <b>Alteration</b>                          |                          |                          |                           |                            |                               |
| No alteration                              | 13 (36)                  | 17 (68)                  | 38 (93)                   | 68 (99)                    | $\chi^2$ : p<.001             |
| Use alteration                             | 23 (64)                  | 8 (32)                   | 3 (7)                     | 1 (1)                      |                               |
| <b>Extra device</b>                        |                          |                          |                           |                            |                               |
| No extra device                            | 25 (69)                  | 20 (80)                  | 39 (95)                   | 69 (100)                   | F: p<.001                     |
| Use device not provided                    | 11 (31)                  | 5 (20)                   | 2 (5)                     | 0 (0)                      |                               |
| <b>Reward</b>                              |                          |                          |                           |                            |                               |
| No reward                                  | 31 (86)                  | 21 (84)                  | 38 (93)                   | 69 (100)                   | F: p=.002                     |
| Use reward                                 | 5 (14)                   | 4 (16)                   | 3 (7)                     | 0 (0)                      |                               |
| <b>Restraint</b>                           |                          |                          |                           |                            |                               |
| No restraint                               | 36 (100)                 | 22 (88)                  | 39 (95)                   | 69 (100)                   | F: p=.007                     |
| Use restraint                              | 0 (0)                    | 3 (12)                   | 2 (5)                     | 0 (0)                      |                               |

<sup>a</sup> n (%): number and percentages;  $\chi^2$  (Pearson's Chi-Squared Test) if sample size >30, a minimum expectation of 5 for 80% of cells, without any null expectation, else F (Fisher's Exact Test) which is inapplicable for too large sample (>1000)
